# Supplementary material for: Self-reversal facilitates the resolution of HMCES DNA-protein crosslinks in cells
Source: PubMed Central journal article supplement — Cell Rep. Author manuscript; Available in PMC 2024 Feb 5. (PMC10842721; doi:10.1016/j.celrep.2023.113427), 2023-11-11
Supplement: NIHMS1948205-supplement-1.pdf [file NIHMS1948205-supplement-1.pdf]

**Cell Reports, Volume 42**

**Supplemental information**

**Self-reversal facilitates the resolution  
of HMCES DNA-protein crosslinks in cells**

**Jorge Rua-Fernandez, Courtney A. Lovejoy, Kavi P.M. Mehta, Katherine A. Paulin, Yasmine T. Toudji, Celeste Giansanti, Brandt F. Eichman, and David Cortez**

## SUPPLEMENTAL INFORMATION

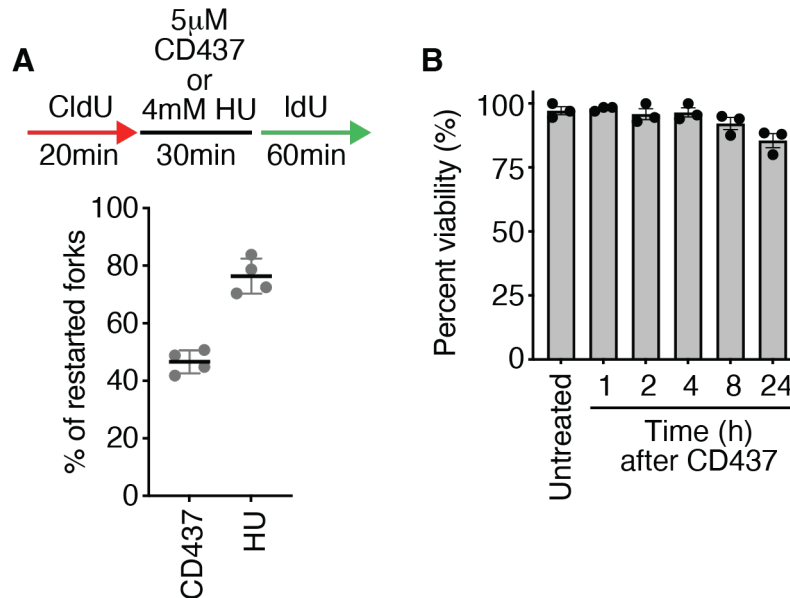

**Figure S1. Characterization of CD437 effects on replication and cell viability. (Related to Figure 1)**

- (A) U2OS cells were labeled and treated as indicated. DNA combing was performed, and the percentage of restarted forks (red + green DNA tracks) compared to total (red and green only) was measured. Mean and SEM from n=4 replicates is shown.
- (B) Cells were treated with 5 $\mu$ M CD437 for 30 minutes and then incubated in fresh media. Cell viability was measured at the indicated times using trypan blue staining.

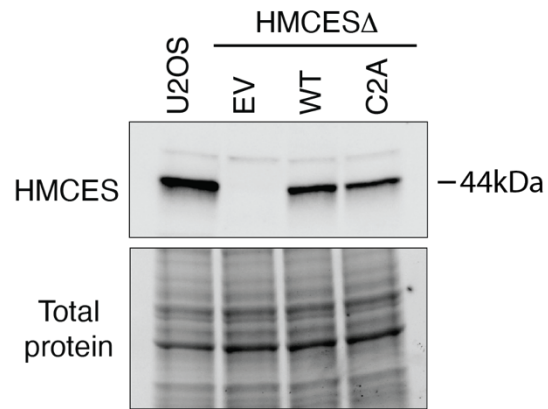

**Figure S2. Immunoblot of HMCES expression. (Related to Figure 1)**

Immunoblot analysis of total HMCES protein in U2OS cells and HMCES $\Delta$  cells complemented with empty vector (EV), WT, or C2A HMCES. Below are total protein levels, using a stain-free image as a loading control.

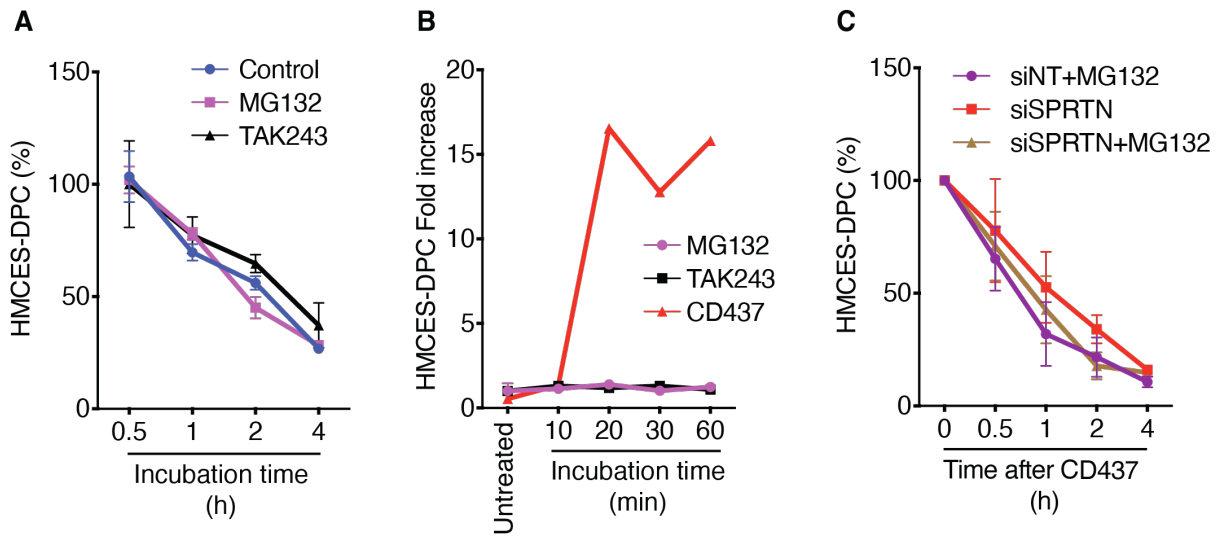

**Figures S3. Analysis of Proteasome, E1 ubiquitin-activating enzyme, and SPRTN contributions to HMCES-DPC resolution. (Related to Figure 2)**

- (A) Percentages remaining of HMCES-DPC with HMCES-DPC levels at 0.5h set to 100%. RADAR assay was performed as in Figure 1E. Mean  $\pm$  SEM, n=3.
- (B) Quantification of HMCES-DPC formation during incubation with CD437, MG132, or TAK243 for the indicated times.
- (C) Quantification of HMCES-DPC removal in cells transfected with non-targeting (siNT) or SPRTN siRNAs and treated with MG132. MG132 was added during and after CD437 treatment.

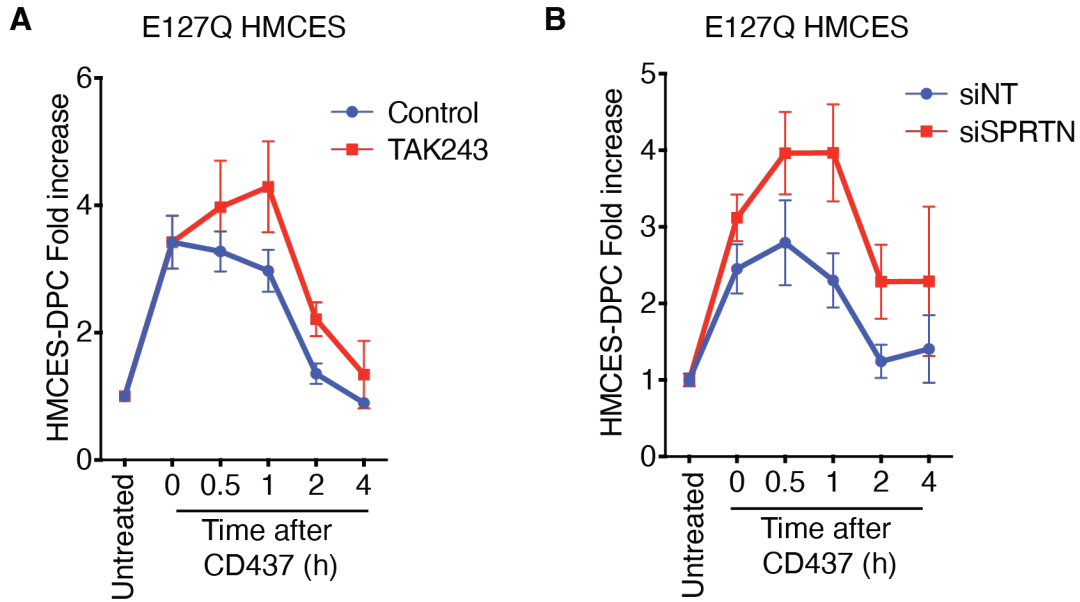

**Figure S4. Effects of TAK243 and SPRTN inactivation on stability of the E127Q HMCES-DPC. (Related to Figure 4)**

- (A) RADAR assay of E127Q HMCES-DPC levels in cells either that were mock treated or treated with TAK243. TAK243 was added immediately after CD437 treatment. Mean  $\pm$  SEM, n=3.
- (B) RADAR assay of E127Q HMCES-DPC levels in cells transfected with non-targeting (siNT) or SPRTN (siSPRNTN) siRNAs. Mean  $\pm$  SEM, n=4.

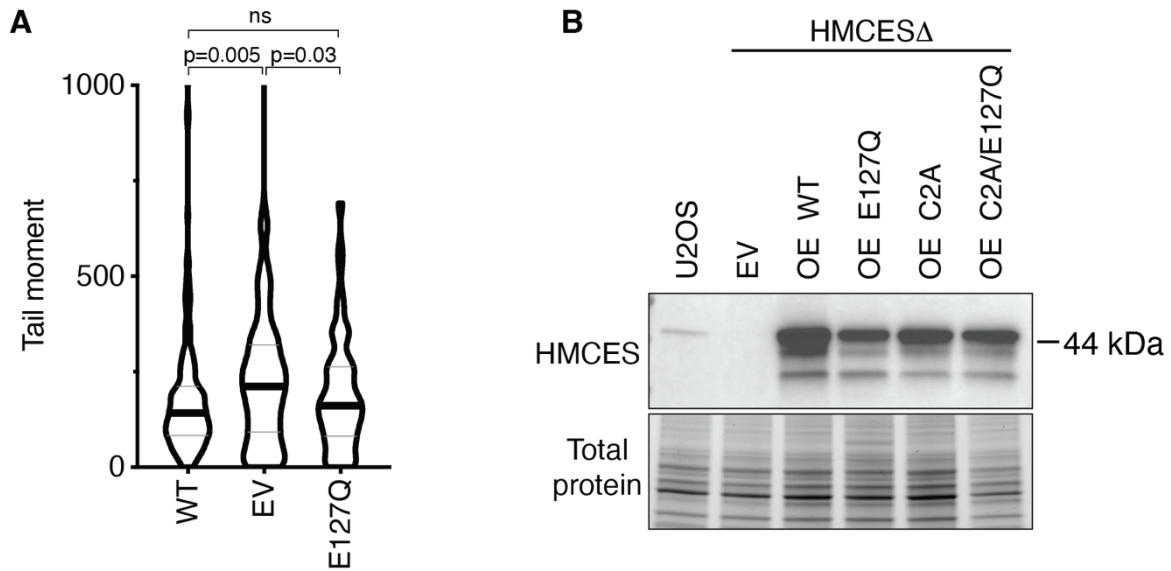

**Figures S5. Comet assay and immunoblot of HMCES overexpression. (Related to Figure 5)**

- (A) Neutral comet assay was used to measure DSBs in HMCESD cells containing an empty vector (EV) or expressing near endogenous levels of WT or E127Q HMCES. P values were calculated by a one-way ANOVA with a Dunnett posttest.
- (B) Immunoblot of U2OS or HMCES $\Delta$  cells containing an empty vector (EV) or overexpressing WT, E127Q, C2A, or C2A/E127Q HMCES proteins.
